# Supplementary material for: Avirulent Isolates of Penicillium chrysogenum to Control the Blue Mold of Apple Caused by P. expansum
Source: MDPI journal article supplement (doi:10.3390/microorganisms11112792), 2023-11-17
Supplement: s1 [file s1]

## Supplementary Materials

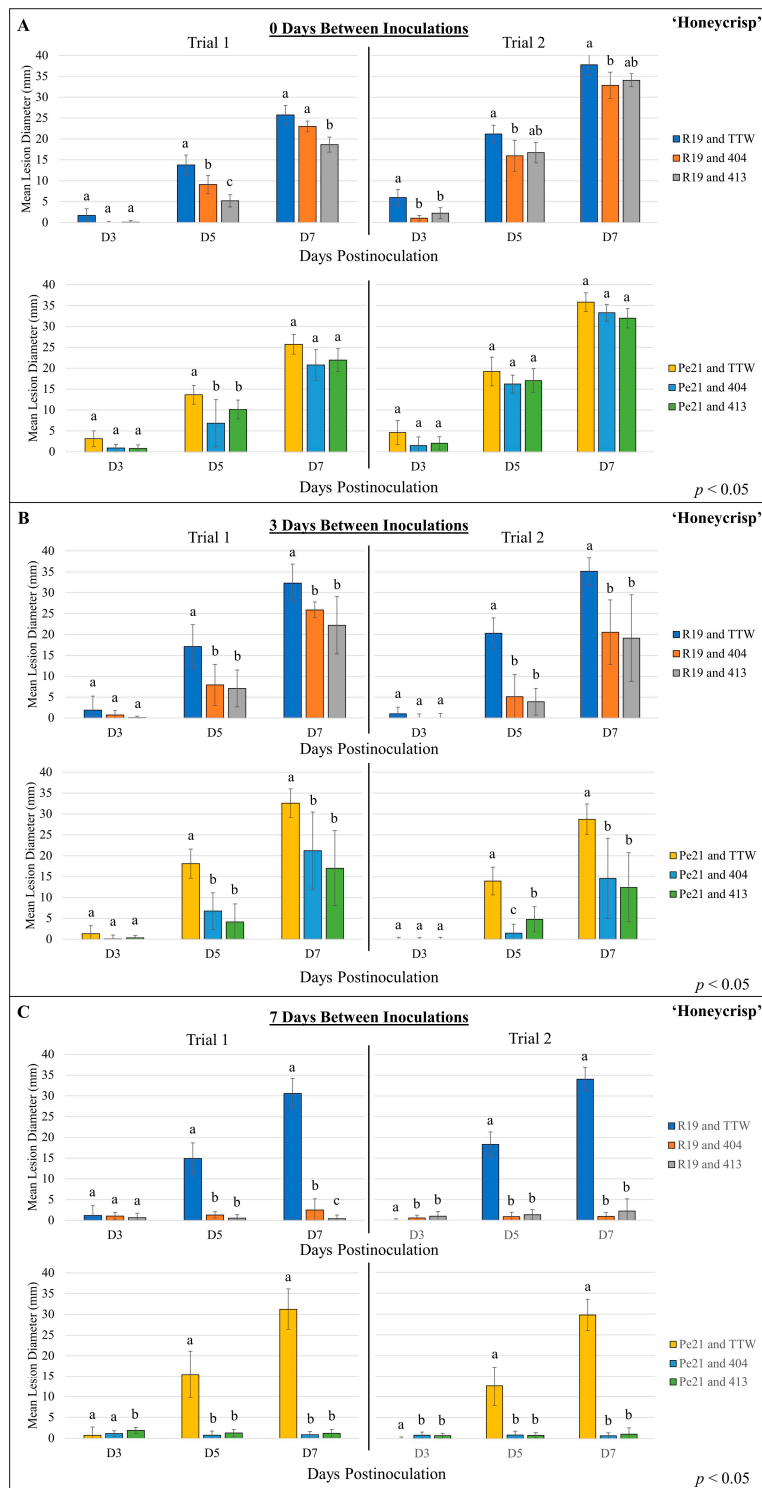

**Figure S1.** 'Honeycrisp' apples co-inoculated with *P. chrysogenum* and *P. expansum* isolates at different times. Mean lesion diameter of wounds inoculated with *P. expansum* R19 and Pe21 at A) 0, B) 3, and C) 7 days after *P. chrysogenum* 404 and 413 inoculation into wounded 'Honeycrisp' apples (0, 3, and 7 DBI). All measurements were collected at 3, 5, and 7 days (D3, D5, and D7) postinoculation of the *P. expansum* inoculum, with the mean wound diameter of TTW-inoculated fruit subtracted from each strain. Error bars represent standard deviation. An ANOVA with Tukey's HSD post hoc test ( $p < 0.05$ ), or a Kruskal-Wallis test with Wilcoxon post hoc test ( $p < 0.05$ ,  $n = 5$ ) was performed to determine significance between inoculum at each timepoint. Values with the same letter are not significantly different. DBI = days between inoculations.

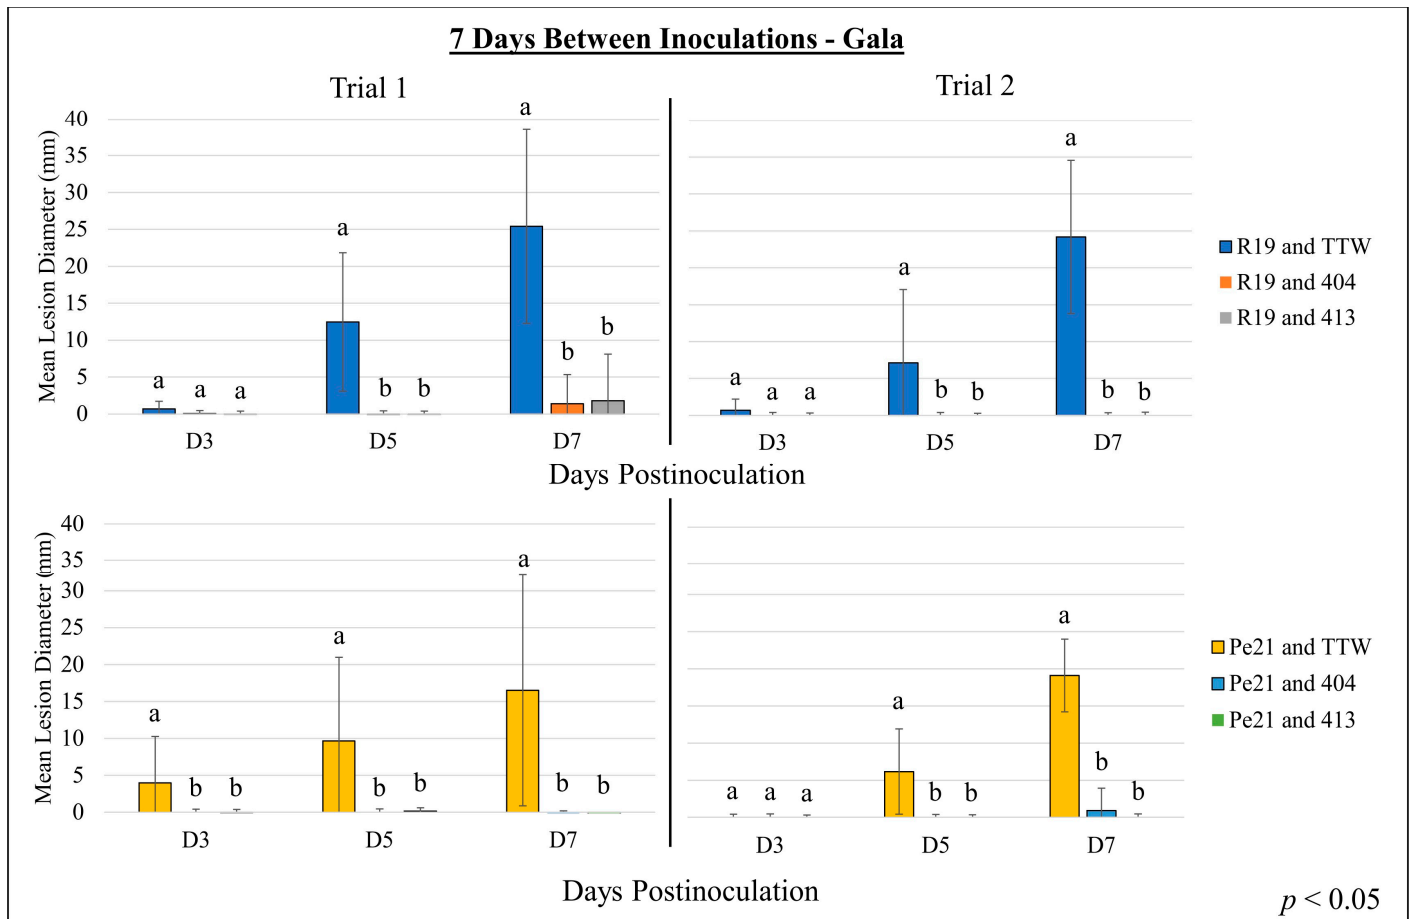

**Figure S2.** ‘Gala’ apples co-inoculated with *P. chrysogenum* and *P. expansum* isolates at different times. Mean lesion diameter from wounds inoculated with *P. expansum* R19 and Pe21 at 7 days after *P. chrysogenum* 404 and 413 inoculation into wounded ‘Gala’ apples (7 DBI). All measurements collected at 3, 5, and 7 days (D3, D5, and D7) postinoculation of the *P. expansum* inoculum, with the mean wound diameter of TTW-only inoculated fruit subtracted from each strain. Error bars represent the standard deviation. A Kruskal-Wallis test was performed with Wilcoxon post hoc test ( $p < 0.05$ ,  $n = 5$ ) to determine significance between strains at each timepoint. Values with the same letter are not significantly different. DBI = days between inoculations.

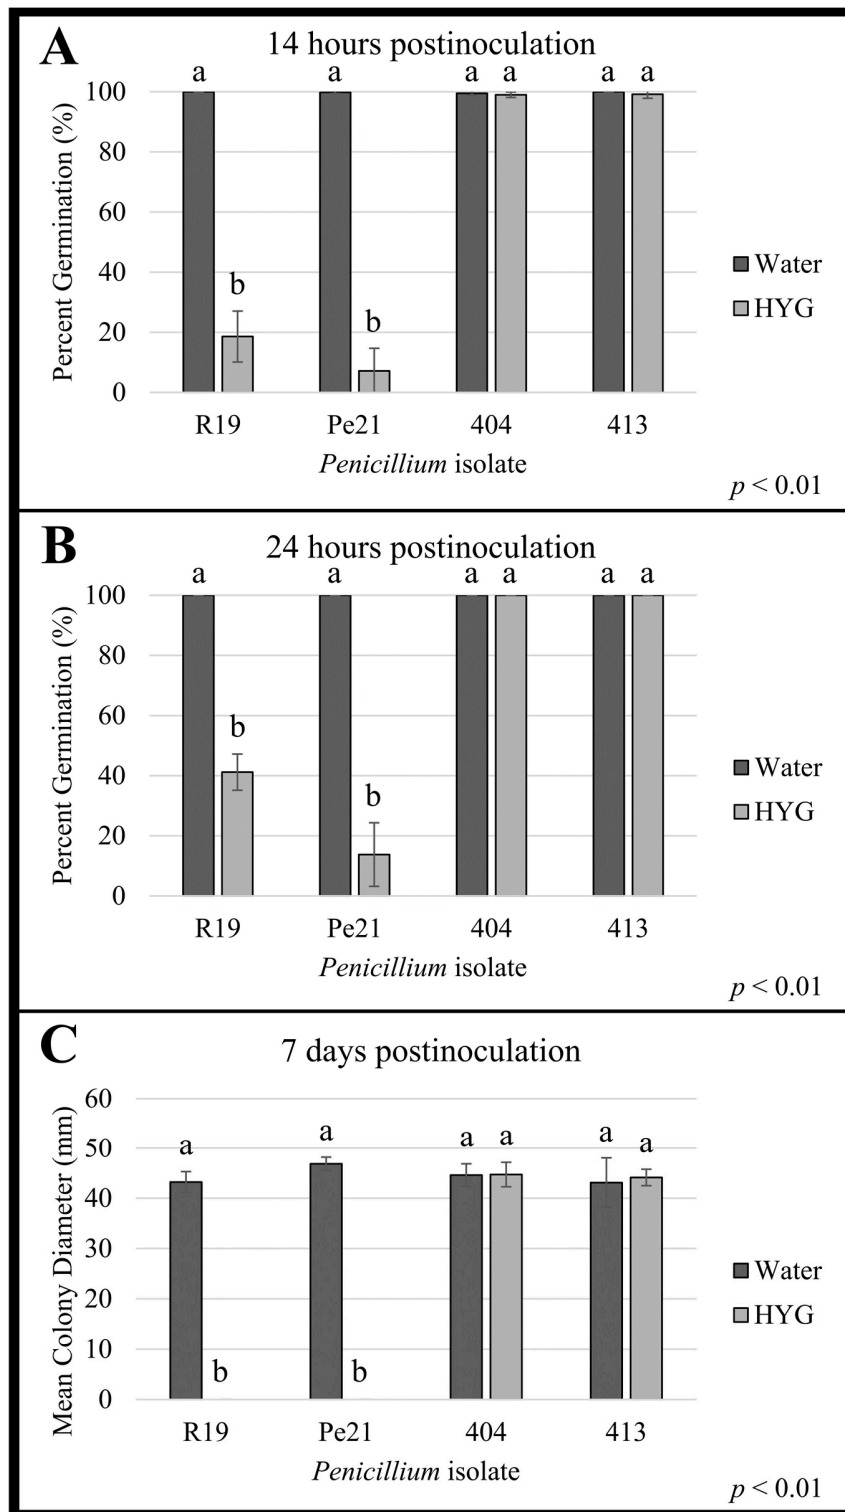

**Figure S3.** Conidial germination and radial growth of *Penicillium* spp. isolates following hygromycin treatment. Germination of *Penicillium expansum* R19 and Pe21, and *P. chrysogenum* 404 and 413 after A) 14 hours and B) 24 hours after exposure to water or hygromycin (HYG; 100 ppm), and C) Radial growth of the four fungal isolates 7 days postinoculation. A Student's *t*-test or Mann-Whitney U test was performed to determine significance between treatments for each individual isolate ( $p < 0.01$ ,  $n = 6$ ), and error bars represent standard deviation. Values with the same letter are not significantly different.

**Table S1.** Re-isolation and growth of *Penicillium* spp. strains on selective media, containing hygromycin B, recovered from apple fruit cultivars ‘Fuji’, ‘Gala’, ‘Golden Delicious’, and ‘Honeycrisp’ 7 days postinoculation<sup>a</sup>

| Strain                             | Apple Cultivar     | PDA | PDA + hygromycin B (100 ppm) |
|------------------------------------|--------------------|-----|------------------------------|
| <i>Penicillium expansum</i> R19    | ‘Fuji’             | +   | -                            |
|                                    | ‘Gala’             | +   | -                            |
|                                    | ‘Golden Delicious’ | +   | -                            |
|                                    | ‘Honeycrisp’       | +   | -                            |
| <i>Penicillium expansum</i> Pe21   | ‘Fuji’             | +   | -                            |
|                                    | ‘Gala’             | +   | -                            |
|                                    | ‘Golden Delicious’ | +   | -                            |
|                                    | ‘Honeycrisp’       | +   | -                            |
| <i>Penicillium chrysogenum</i> 404 | ‘Fuji’             | +   | +                            |
|                                    | ‘Gala’             | +   | +                            |
|                                    | ‘Golden Delicious’ | +   | +                            |
|                                    | ‘Honeycrisp’       | +   | +                            |
| <i>Penicillium chrysogenum</i> 413 | ‘Fuji’             | +   | +                            |
|                                    | ‘Gala’             | +   | +                            |
|                                    | ‘Golden Delicious’ | +   | +                            |
|                                    | ‘Honeycrisp’       | +   | +                            |
| TTW                                | ‘Fuji’             | -   | -                            |
|                                    | ‘Gala’             | -   | -                            |
|                                    | ‘Golden Delicious’ | -   | -                            |
|                                    | ‘Honeycrisp’       | -   | -                            |

<sup>a</sup>Growth on agar medium indicated with ‘+’, no growth indicated with ‘-’. TTW = Tween-Treated Water control. PDA = Potato Dextrose Agar.

**Table S2.** Wound sizes (expressed as mean lesion diameter in mm) caused by *P. chrysogenum* and *P. rubens* spore suspensions inoculated in wounded apple fruit 14 days postinoculation.

| Isolate                          | ‘Golden Delicious’ | ‘Honeycrisp’ | ‘Fuji’       |
|----------------------------------|--------------------|--------------|--------------|
| <i>P. chrysogenum</i> DTO 275-D7 | 3.5 ± 0.72         | 0            | 0.76 ± 0.44  |
| <i>P. chrysogenum</i> DTO 431-E3 | 3.34 ± 1.51        | 0            | 0            |
| <i>P. chrysogenum</i> DTO 402-A9 | 3.82 ± 1.29        | 0            | 0            |
| <i>P. chrysogenum</i> DTO 382-H5 | 3.4 ± 1.10         | 0 ± 1.97     | 0            |
| <i>P. rubens</i> DTO 405-A6      | 3.7 ± 0.85         | 0            | 0            |
| <i>P. rubens</i> DTO 397-13      | 3.7 ± 0.63         | 0            | 0            |
| <i>P. rubens</i> DTO 346-D4      | 5.82 ± 0.33        | 0.48 ± 5.46  | 0.72 ± 4.34  |
| <i>P. chrysogenum</i> 404        | 2.82 ± 1.63        | 0            | 0.692 ± 0.42 |
| <i>P. chrysogenum</i> 413        | 2.54 ± 1.50        | 0.98 ± 0.71  | 1.24 ± 0.28  |
| <i>P. expansum</i> R19           | 52.02 ± 8.87       | 61.3 ± 2.92  | 54.76 ± 3.27 |

<sup>a</sup>Type-specimens of *P. chrysogenum* and *P. rubens* were inoculated into apple fruits and compared to isolates 404, 413, and *P. expansum* R19. Lesion diameters were recorded 14 days postinoculation. Table provides representative data for one trial. All data represented with subtracted TTW-inoculated control wound. Standard deviation presented after “±”.

**Table S3.** Growth of *Penicillium* spp. strains on selective media, containing different antimicrobial compounds at specific discriminatory doses, after 7 days<sup>a</sup>

| Fungicide (medium) | <i>Penicillium</i> spp. isolate |      |     |     |
|--------------------|---------------------------------|------|-----|-----|
|                    | R19                             | Pe21 | 404 | 413 |
| TBZ (PDA)          | -                               | -    | -   | -   |
| FLU (PDA)          | -                               | -    | -   | -   |
| PYR (SA)           | -                               | -    | -   | -   |
| DIF (MEA)          | -                               | -    | -   | -   |
| HYG (PDA)          | -                               | -    | +   | +   |
| PAT (PDA)          | +                               | +    | +   | +   |
| PDA control        | +                               | +    | +   | +   |
| SA control         | +                               | +    | +   | +   |
| MEA control        | +                               | +    | +   | +   |

<sup>a</sup>Growth on agar indicated with '+', no growth indicated with '-'. PDA = Potato Dextrose Agar; SA = Sugar Agar; MEA = Malt Extract Agar; TBZ = thiabendazole (10 ppm); PYR = pyrimethanil (0.5 ppm); DIF = difenoconazole (2.5 ppm); FLU = fludioxonil (0.5 ppm); HYG = hygromycin (100 ppm)
